# Supplementary material for: A fluorescent probe capable of detecting H2S at submicromolar concentrations in cells
Source: Royal Society of Chemistry journal article supplement (doi:10.1039/c2cc35602c), 2012-01-01

## ***Supporting Information***

### **A fluorescent probe capable of detection of H<sub>2</sub>S at a submicromolar range and in cellular imaging**

Weimin Xuan,<sup>a</sup> Rong Pan,<sup>b</sup> Yanting Cao,<sup>a</sup> Kejian Li,<sup>b</sup> and Wei Wang<sup>a\*</sup>

<sup>a</sup> *Department of Chemistry & Chemical Biology, University of New Mexico, MSC03 2060, Albuquerque, NM 87131, USA*

<sup>b</sup> *Department of Pharmaceutical Sciences, College of Pharmacy, University of New Mexico, MSC03 2060, Albuquerque, NM 87131, USA*

**General Information:** Commercial reagents were used as received, unless otherwise stated. Merck 60 silica gel was used for chromatography, and Whatman silica gel plates with fluorescence F<sub>254</sub> were used for thin-layer chromatography (TLC) analysis. <sup>1</sup>H and <sup>13</sup>C NMR spectra were recorded on Bruker tardis (sb300) and Bruker Avance 500. Data for <sup>1</sup>H are reported as follows: chemical shift (ppm), and multiplicity (s = singlet, d = doublet, t = triplet, q = quartet, m = multiplet). Data for <sup>13</sup>C NMR are reported as ppm.

**Spectroscopic materials and methods:** Millipore water was used to prepare all aqueous solutions. The pH was recorded by a Beckman Φ<sup>TM</sup> 240 pH meter. UV absorption spectra were recorded on a Shimadzu UV-2410PC UV-Vis spectrophotometer. Fluorescence emission spectra were obtained on a SHIMADZU spectrofluorophotometer RF-5301pc. Cell imaging experiments were carried out by Olympus IX71 fluorescence microscopy.

### 1. Probe synthesis

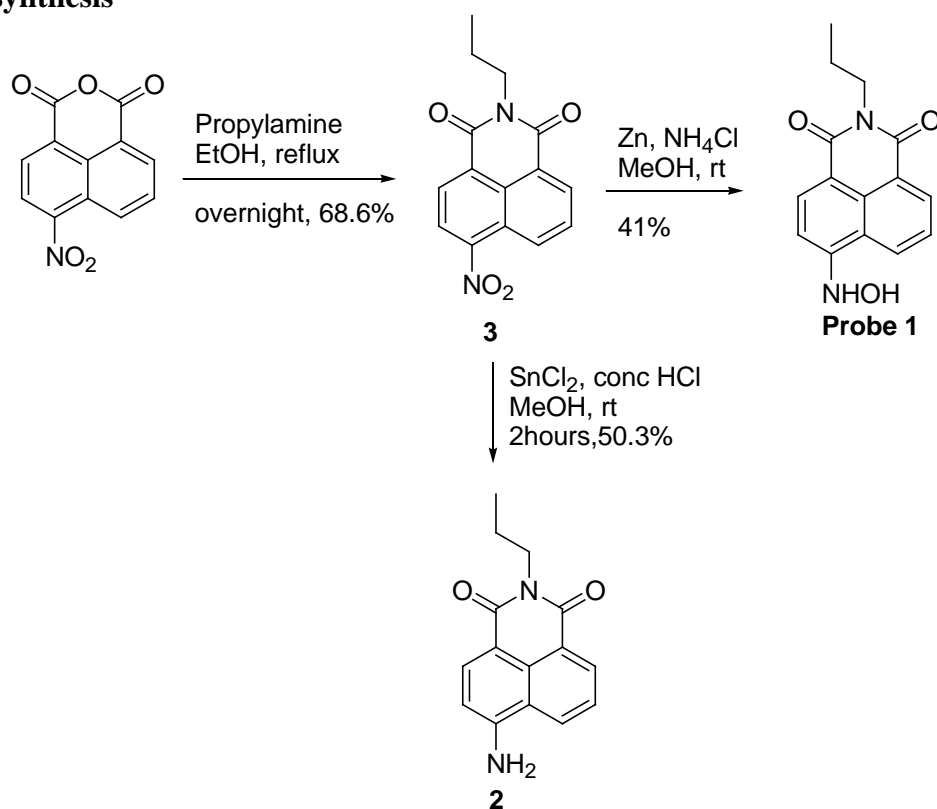

**6-Nitro-2-propyl-1H-benzo[de]isoquinoline-1,3(2H)-dione (3).** To 4-nitro-1,8-naphthalic anhydride (300 mg, 1.23 mmol) in 20 mL of EtOH was added propylamine (203 μL, 2.46 mmol), then heated to reflux and stirred overnight. The solvent was removed by rotavapor, then the product was purified through column chromatograph, and obtained as straw yellow solid (240 mg, 69%). <sup>1</sup>H NMR (CDCl<sub>3</sub>): δ 8.72 (d, *J* = 8.5 Hz, 1H), 8.63 (d, *J* = 7.5 Hz, 1H), 8.59 (d, *J* = 8.0 Hz, 1H), 8.32 (d, *J* = 8.0 Hz, 1H), 7.91 (t, *J* = 8.0 Hz, 1H), 4.08 (t, *J* = 7.5 Hz, 2H), 1.75-1.68 (m, 2H), 0.98 (t, *J* = 7.5 Hz, 3H). <sup>13</sup>C NMR (500 MHz, CDCl<sub>3</sub>): δ 156.06, 155.24, 142.29, 125.18, 122.76, 122.58, 122.03, 121.81, 119.80, 116.75, 116.40, 115.82, 35.19, 14.18, 4.38.

**6-Amino-2-propyl-1H-benzo[de]isoquinoline-1,3(2H)-dione (2).** To a solution of compound (3) (240 mg, 0.84 mmol) in 10 mL of MeOH was added SnCl<sub>2</sub> (960 mg, 5.06 mmol) followed 2 mL

of conc. HCl. The mixture was stirred at room temperature for 2 hours. The solvent was removed under rotavapor, then 20 mL of H<sub>2</sub>O was added, and the pH was adjusted to basic by aq. NaOH (2M). The product was extracted with DCM (30 mL × 3), dried over Na<sub>2</sub>SO<sub>4</sub>, further purified through column chromatograph and obtained as yellow solid (108 mg, 50.3%). <sup>1</sup>H NMR (CDCl<sub>3</sub>): δ 8.60 (d, *J* = 6.9 Hz, 1H), 8.41 (d, *J* = 8.1 Hz, 1H), 8.10 (d, *J* = 8.4 Hz, 1H), 7.65 (t, *J* = 8.4 Hz, 1H), 6.88 (d, *J* = 8.1 Hz, 1H), 4.95 (s, 2H), 4.13 (t, *J* = 7.5 Hz, 2H), 1.82-1.69(m, 2H), 1.00 (t, *J* = 7.4 Hz, 3H). <sup>13</sup>C NMR (500 MHz, CDCl<sub>3</sub> with 2 drops of CD<sub>3</sub>OD): δ 164.70, 164.18, 149.41, 133.83, 131.45, 129.77, 127.01, 124.83, 122.95, 119.96, 111.70, 109.34, 41.69, 21.37, 11.47. HRMS (*m/z*): calcd. for C<sub>15</sub>H<sub>15</sub>N<sub>2</sub>O<sub>2</sub> [M + H]<sup>+</sup>: 255.1134, found, 255.1142.

**6-(Hydroxyamino)-2-propyl-1H-benzo[de]isoquinoline-1,3(2H)-dione (probe 1).** To a solution of compound (3) (62 mg, 0.22 mmol) in 10mL MeOH was added Zinc powder (32 mg, 0.49 mmol) and NH<sub>4</sub>Cl (14 mg, 0.26 mmol), then stirred at room temperature for 1 hours. Another 10mL CH<sub>2</sub>Cl<sub>2</sub> and 10 mL of MeOH was added, the solid was removed by filtration, then the solvent was removed by rotavapor. The product was purified through column chromatograph, and obtained as yellow solid (24mg, 41%). <sup>1</sup>H NMR (DMSO-*d*<sub>6</sub>): δ 10.46 (s, 1H), 9.31 (s, 1H), 8.43-8.40 (m, 2H), 8.33 (d, *J* = 8.4 Hz, 1H), 7.68(t, *J* = 8.0 Hz, 1H), 7.19 (d, *J* = 8.4 Hz, 1H), 3.96 (t, *J* = 7.5 Hz, 2H), 1.67-1.55 (m, 2H), 0.98 (t, *J* = 7.4 Hz, 3H). <sup>13</sup>C NMR (300 MHz, CD<sub>3</sub>OD): δ 166.13, 165.73, 154.52, 135.38, 132.06, 130.45, 129.05, 125.89, 123.41, 120.11, 112.21, 106.61, 42.62, 22.43, 11.74. HRMS (*m/z*): calcd. for C<sub>15</sub>H<sub>15</sub>N<sub>2</sub>O<sub>3</sub> [M + H]<sup>+</sup>: 271.1083, found, 271.1094.

- Fluorescence quantum yields were calculated according to the equation below by reference to fluorescein in basic ethanol ( $\Phi = 0.97$ ).

$$\Phi_X = \Phi_S * [A_S / A_X] * [F_X / F_S] * [n_X / n_S]^2$$

where,  $\Phi_S$  is the reported quantum yield of the standard fluorescein.  $A_S$  is the absorbance at the excitation wavelength of the standard.  $A_X$  is the absorbance at the excitation wavelength of the measured compound.  $F_X$  is the area under the emission spectra of the measured compound.  $F_S$  is the area under the emission spectra of the standard.  $n_X$  is the refractive index of the solvent used.  $n_S$  is the refractive index of the solvent of the standard.

### 3. Probe stability study.

**Figure S1.** Probe 1 with concentration of 2.0 μM was incubated in 100 mM pH 7.4 phosphate buffer solution for 120 min. Only negligible fluorescence change was observed.

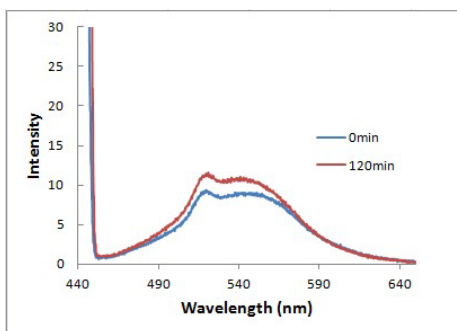

4. **Figure S2.** Absorbance of probe **1** and compound **2** (2.0  $\mu\text{M}$  respectively).

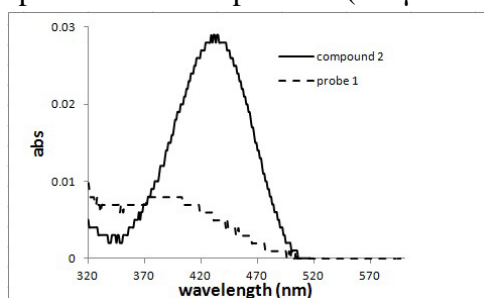

5. Evidence of detection mechanism

38 mg probe **1** was treated with 5 eq.  $\text{Na}_2\text{S} \cdot 9\text{H}_2\text{O}$  at pH 7-8 aqueous solution, then the mixture was stirred at rt for 10 h. The only fluorescent compound was successfully separated with yield 11.4%, and the obtained HNMR spectra was consistent with compound **2** synthesized above; 73.6% of the probe **1** was recovered

6. **Figure S3.** The effect of medium pH on probe **1** toward  $\text{H}_2\text{S}$ . Fluorescence intensity was recorded at 120 min when probe **1** (2.0  $\mu\text{M}$ ) reacted with  $\text{Na}_2\text{S}$  (10.0  $\mu\text{M}$ ) in 0.1 M phosphate buffer (containing 0.2% DMSO).  $\lambda_{\text{ex}} = 440 \text{ nm}$ , fluorescent intensity is taken at  $\lambda_{\text{em}} = 544 \text{ nm}$ .

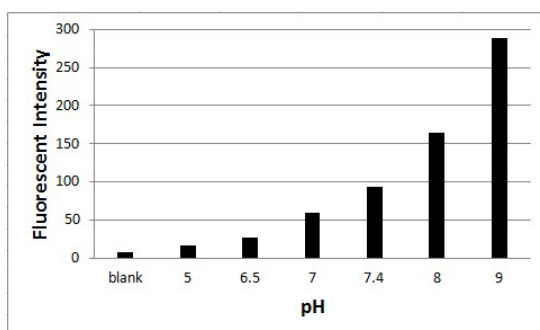

7. Comparison with the reported nitro-reduction based probe.

**Figure S4.** Probe **1** (e.g., New probe) or **HSN1** (2.0  $\mu\text{M}$ ) was treated with 10  $\mu\text{M}$   $\text{Na}_2\text{S}$  in 100 mM pH 7.4 phosphate buffer solution at 25  $^\circ\text{C}$ . The fluorescence was recorded at 544 nm with an excitation at 440 nm.

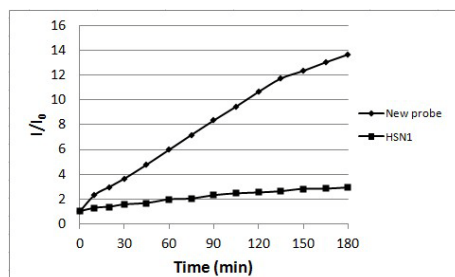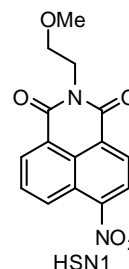

8. **Figure S5.** A possible mechanism for the reduction of hydroxylamine to amine by  $\text{H}_2\text{S}$ .

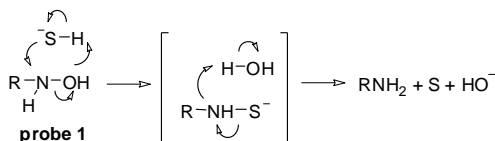

9. **Figure S6.** The detection of other potential reductants.

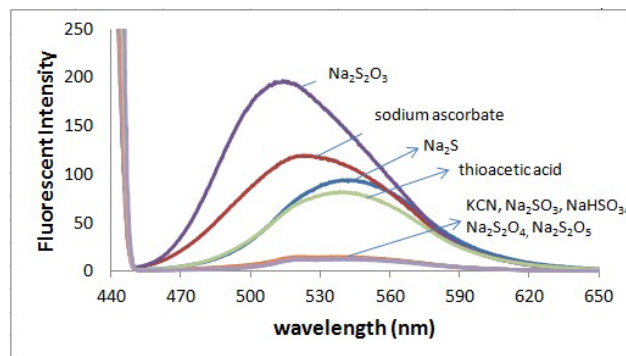

Probe **1** (2.0  $\mu\text{M}$ ) was treated with 50  $\mu\text{M}$  different compounds above respectively for 2 h.

## 10. Imaging experiments.

### a. Primary culture of rat cortical astrocytes

Primary cortical astrocytes were isolated from the cortices of postnatal day 1 rat brains. The cells were harvested from tissue under sterile conditions, placed through one round of enzymatic dissociation and expansion in astrocyte growth medium (85% Dulbecco's Modified Eagle medium containing 4.5 g/L glucose, and 15% Fetal Bovine Serum).

### b. Intracellular $\text{H}_2\text{S}$ detection

Astrocyte cells were plated onto polylysine-coated glass coverslips. Cells were washed with Dulbecco's Modified Eagle medium (DMEM) and incubated with growth medium containing 2.0  $\mu\text{M}$  probe for 1h at 37 °C. After washing the cells with DMEM, different concentration of  $\text{Na}_2\text{S}$  was added into the growth media of the cells and incubated for 2h at 37 °C. Following a through wash, the coverslips were placed onto Olympus IX71 fluorescence microscopy and imaged with a GFP dichroic mirror.

## References

1. Seybold, P. G.; Garterman, M.; Callis, J. *Photochem. Photobiol.* **1969**, 9, 229-242.

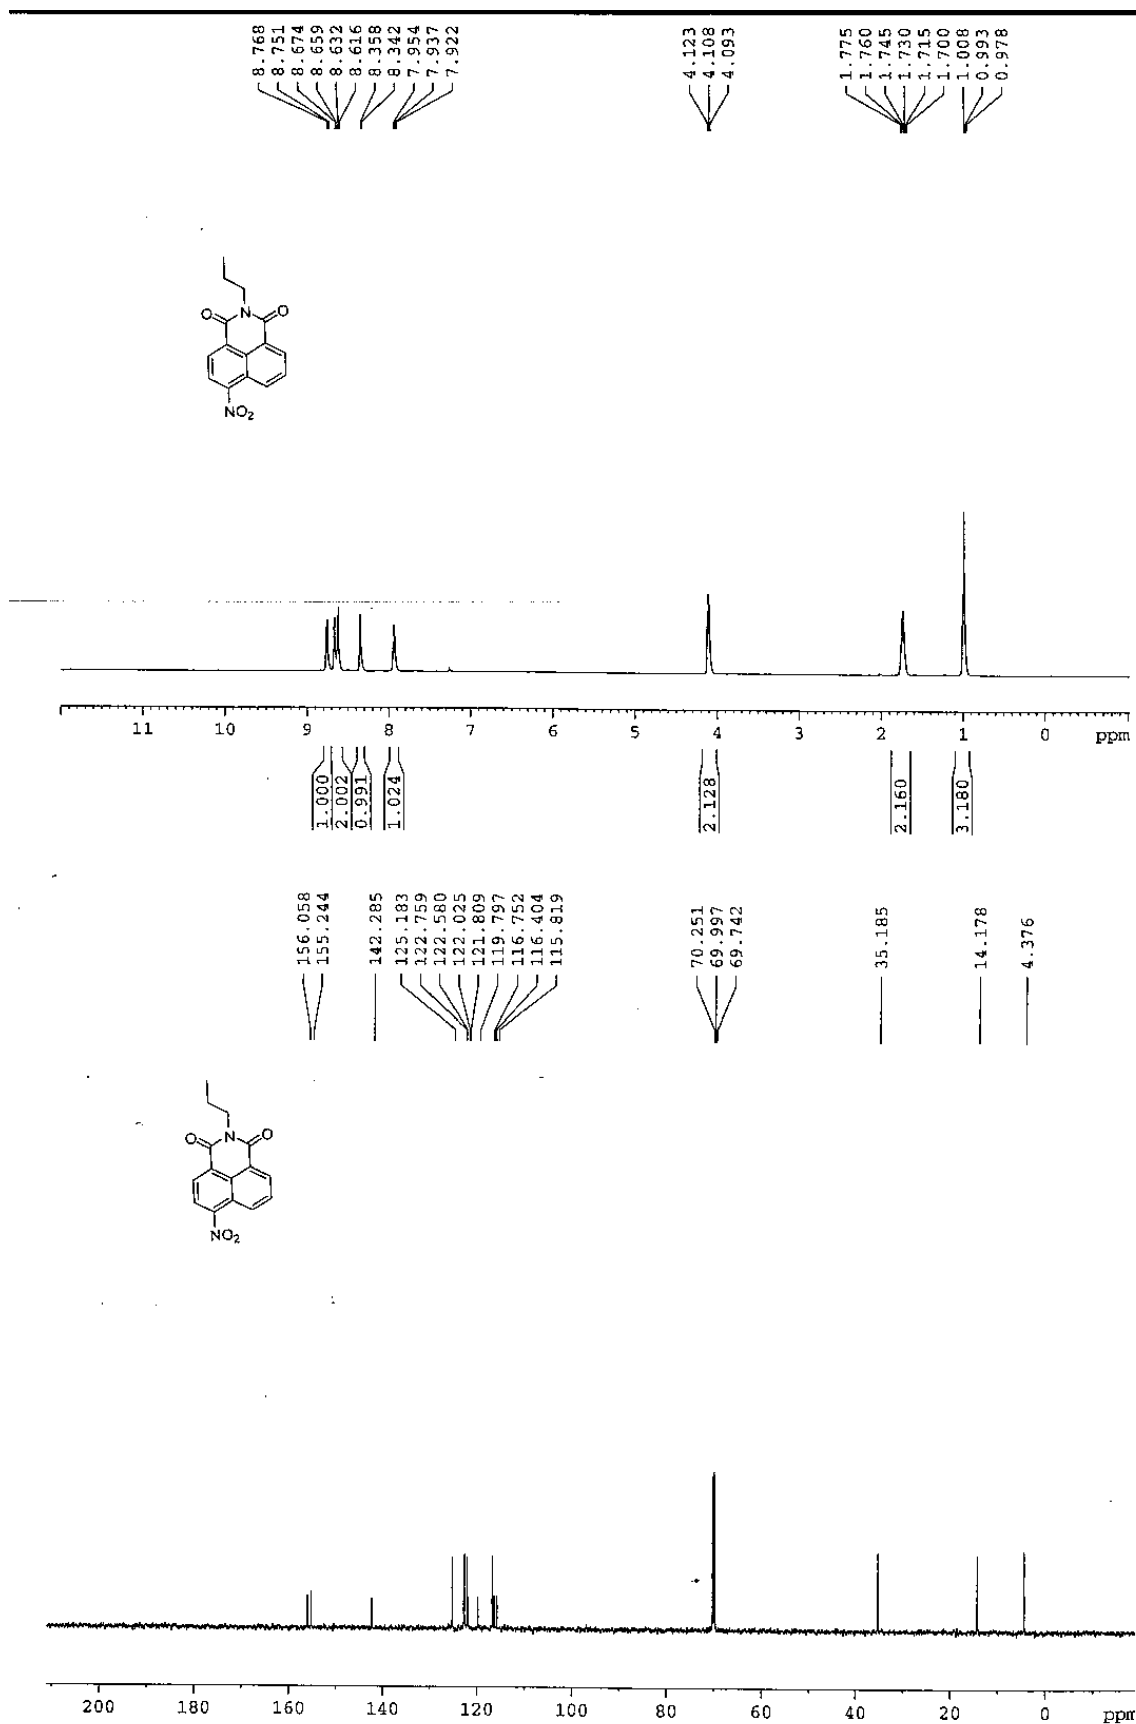

# Compound 1

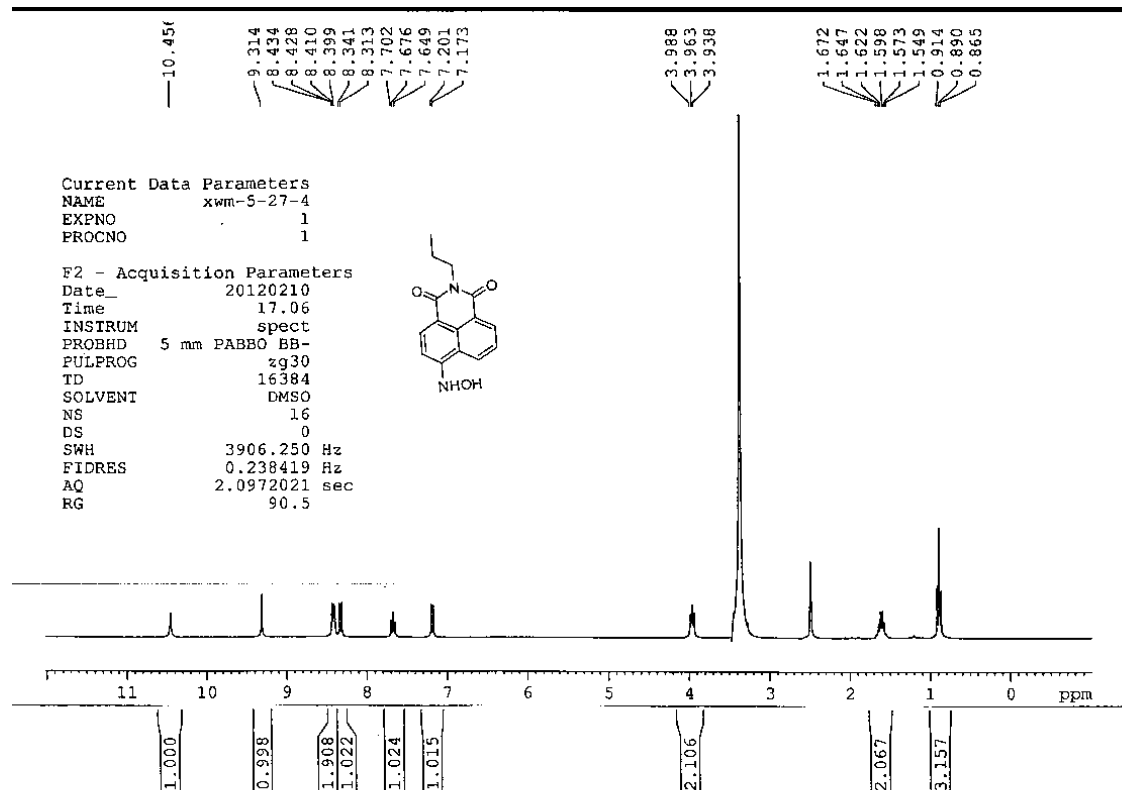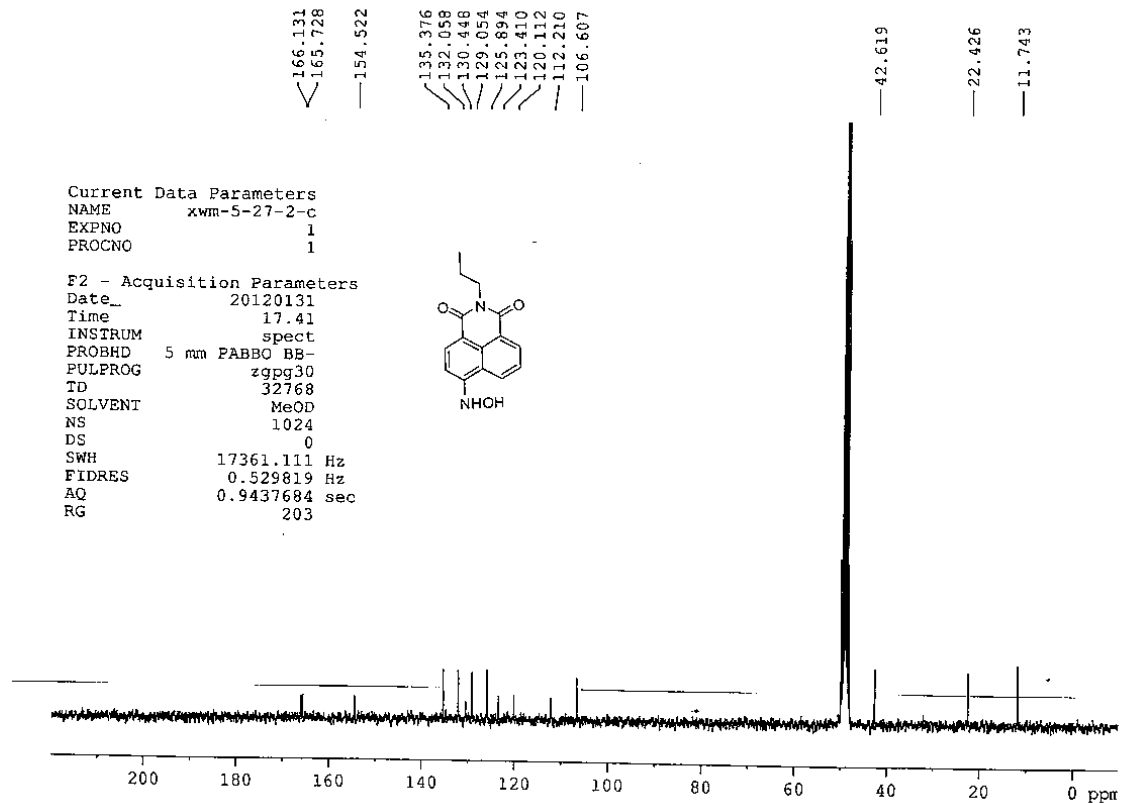

# Compound 2

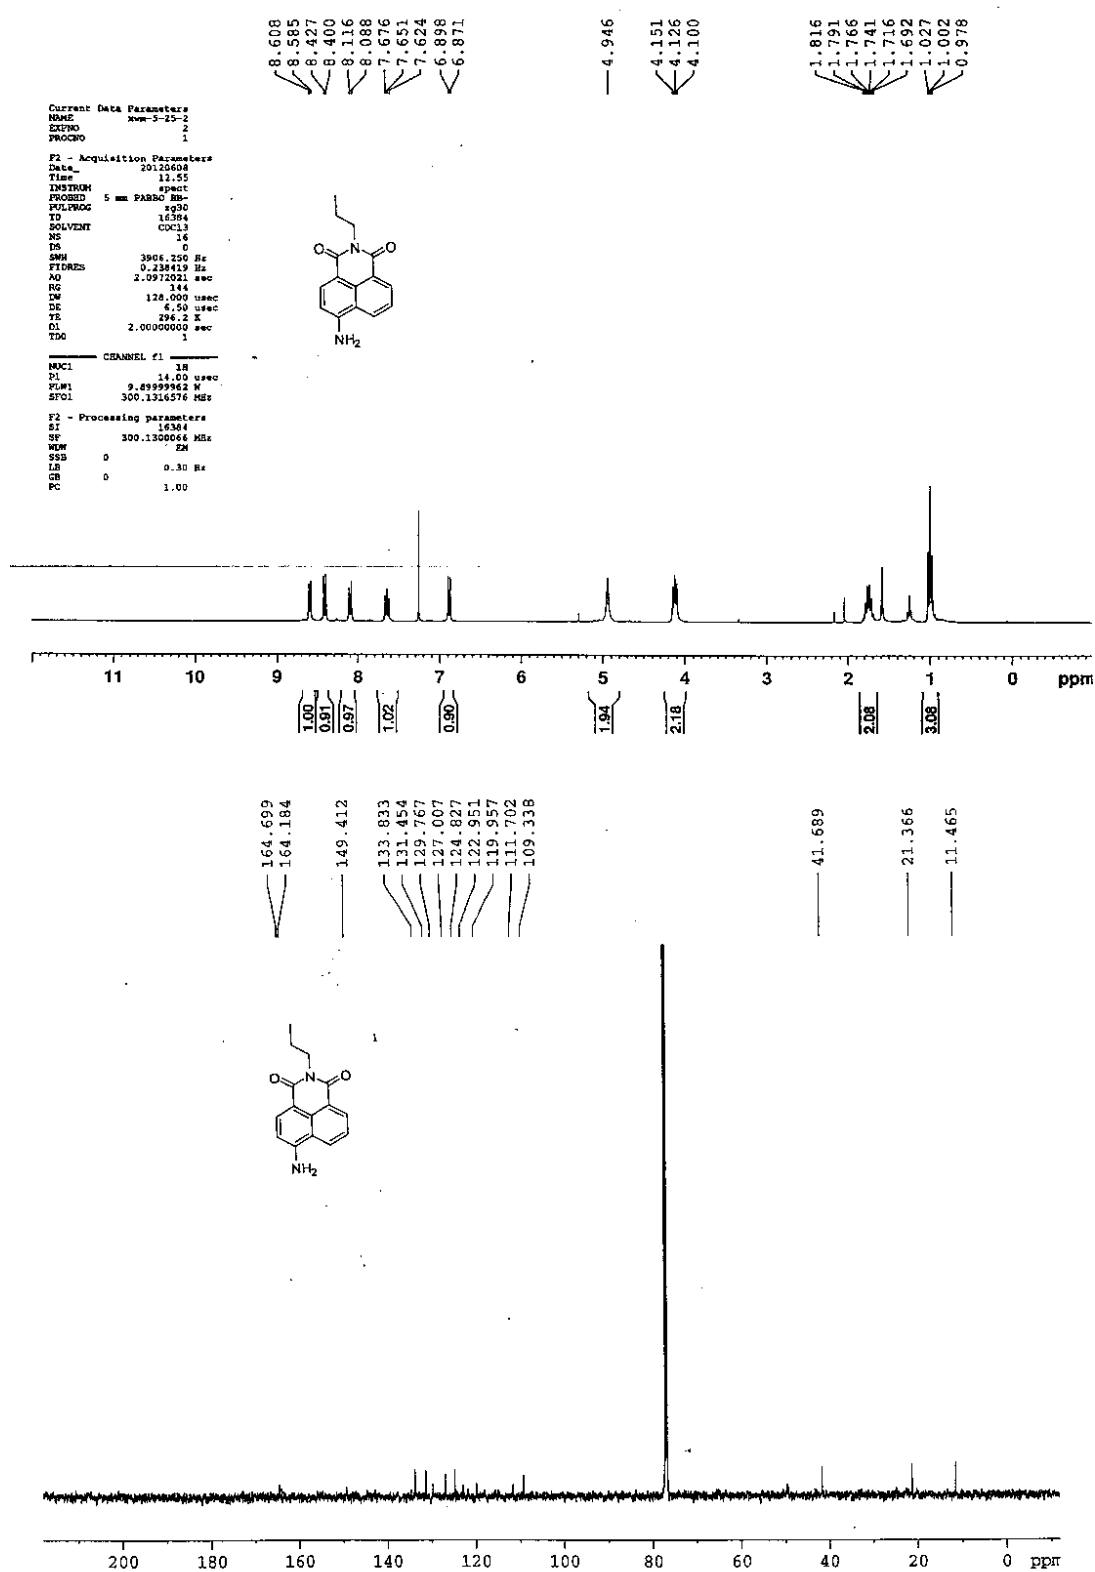

Supplement: c2cc35602c.pdf [file c2cc35602c.pdf]
